# Supplementary material for: An expeditious, highly efficient, catalyst-free and solvent-free synthesis of nitroamines and nitrosulfides by Michael addition
Source: Royal Society of Chemistry journal article supplement (doi:10.1039/c0gc00830c), 2010-12-24
Supplement: c0gc00830c.pdf [file c0gc00830c.pdf]

**Towards absolute green protocol: An expeditious, highly efficient, catalyst-free and solvent-free synthesis of nitroamines and nitrosulfides by Michael addition**

**Garima Choudhary and Rama Krishna Peddinti\***

Department of Chemistry, Indian Institute of Technology, Roorkee 247 667, Uttarakhand, India

**Electronic Supplementary Information**

*Characterization data for all compounds:*      Pages: 2 – 6

**Compound 3a.** mp 83–85 °C;  $^1\text{H}$  NMR ( $\text{CDCl}_3$ , 500 MHz)  $\delta$ : 4.39 (d, 1H,  $J = 4.5$  Hz), 4.71 (d, 2H,  $J = 6.5$  Hz), 5.17 (q, 1H,  $J = 6.5$  Hz), 6.61 (d, 2H,  $J = 8.0$  Hz), 6.75 (t, 1H,  $J = 7.0$  Hz), 7.14 (t, 2H,  $J = 7.5$  Hz), 7.32-7.39 (m, 5H);  $^{13}\text{C}$  NMR ( $\text{CDCl}_3$ , 125 MHz)  $\delta$ : 56.7, 80.0, 113.9, 118.9, 126.5, 128.7, 129.3, 129.4, 137.7, 145.7.

**Compound 3b.** mp 95–96 °C;  $^1\text{H}$  NMR ( $\text{CDCl}_3$ , 500 MHz)  $\delta$ : 2.19 (s, 6H), 4.24 (d, 1H,  $J = 4.5$  Hz), 4.69 (s, 1H), 4.70 (d, 1H,  $J = 2.5$  Hz), 5.16 (q, 1H,  $J = 6.5$  Hz), 6.26 (s, 2H), 6.41 (s, 1H), 7.31-7.35 (m, 1H), 7.37-7.40 (m, 4H);  $^{13}\text{C}$  NMR ( $\text{CDCl}_3$ , 125 MHz)  $\delta$ : 21.5, 56.6, 79.9, 111.8, 121.0, 126.5, 128.6, 129.3, 138.0, 139.1, 145.7.

**Compound 3c.** oily liquid;  $^1\text{H}$  NMR ( $\text{CDCl}_3$ , 500 MHz)  $\delta$ : 3.56 (s, 3H), 4.13 (s, 1H), 4.69 (s, 2H), 5.08 (s, 1H), 6.43-6.72 (m, 4H), 7.33-7.60 (m, 5H);  $^{13}\text{C}$  NMR ( $\text{CDCl}_3$ , 125 MHz)  $\delta$ : 55.7, 57.7, 80.1, 114.9, 115.6, 126.5, 128.6, 129.3, 138.0, 139.6, 153.1.

**Compound 3d.** mp 49–50 °C;  $^1\text{H}$  NMR ( $\text{CDCl}_3$ , 500 MHz)  $\delta$ : 2.40 (d, 2H,  $J = 4.0$  Hz), 2.55 (d, 2H,  $J = 4.5$  Hz), 3.67 (d, 4H,  $J = 3.0$  Hz), 4.35-4.38 (m, 1H), 4.60 (dd, 1H,  $J = 5.5, 12.0$  Hz), 5.01 (t, 1H,  $J = 10.5$  Hz), 7.22 (d, 2H,  $J = 7.0$  Hz), 7.38-7.41 (m, 3H);  $^{13}\text{C}$  NMR ( $\text{CDCl}_3$ , 125 MHz)  $\delta$ : 50.0, 67.0, 67.1, 76.8, 128.7, 129.2, 133.8, 139.1.

**Compound 3e.** mp 125–126 °C;  $^1\text{H}$  NMR ( $\text{CDCl}_3$ , 500 MHz)  $\delta$ : 4.55 (d, 1H,  $J = 5.5$  Hz), 4.77 (d, 2H,  $J = 6.0$  Hz), 5.27 (q, 1H,  $J = 6.5$  Hz), 6.58-6.60 (m, 2H), 6.79 (t, 1H,  $J = 7.5$  Hz), 7.14-7.18 (m, 2H), 7.58 (t, 1H,  $J = 8.0$  Hz), 7.76 (d, 1H,  $J = 7.5$  Hz), 8.19-8.21 (m, 1H), 8.31 (t, 1H,  $J = 1.5$  Hz);  $^{13}\text{C}$  NMR ( $\text{CDCl}_3$ , 125 MHz)  $\delta$ : 55.9, 79.5, 114.0, 119.6, 121.6, 123.8, 129.6, 130.4, 132.8, 140.2, 144.9, 148.9.

**Compound 3f.** mp 43–44 °C;  $^1\text{H}$  NMR ( $\text{CDCl}_3$ , 500 MHz)  $\delta$ : 2.19 (s, 6H), 4.40 (s, 1H), 4.75 (d, 2H,  $J = 5.0$  Hz), 5.26 (t, 1H,  $J = 6.0$  Hz), 6.23 (s, 2H), 6.45 (s, 1H), 7.58 (t, 1H,  $J = 8.0$  Hz), 7.76 (d, 1H,  $J = 7.5$  Hz), 8.19-8.21 (m, 1H), 8.30 (t, 1H,  $J = 2.0$  Hz);  $^{13}\text{C}$  NMR ( $\text{CDCl}_3$ , 125 MHz)  $\delta$ : 21.4, 55.9, 79.5, 111.9, 121.6, 123.7, 130.4, 132.8, 139.3, 140.4, 145.0, 148.9.

**Compound 3g.** mp 86–87 °C;  $^1\text{H}$  NMR ( $\text{CDCl}_3$ , 500 MHz)  $\delta$ : 4.83–4.88 (m, 2H), 5.02 (dd, 1H,  $J = 4.0, 12.5$  Hz), 5.79–5.82 (m, 1H), 6.48–6.49 (m, 2H), 6.73–6.76 (m, 1H), 7.10–7.13 (m, 2H), 7.49–7.53 (m, 1H), 7.60–7.63 (m, 1H), 7.69 (dd, 1H,  $J = 1.0, 7.5$  Hz), 8.10 (dd, 1H,  $J = 1.0, 8.0$  Hz);  $^{13}\text{C}$  NMR ( $\text{CDCl}_3$ , 125 MHz)  $\delta$ : 52.6, 79.3, 113.6, 119.4, 125.8, 129.0, 129.5, 129.7, 133.4, 134.4, 144.7, 148.6.

**Compound 3h.** mp 101–102 °C;  $^1\text{H}$  NMR ( $\text{CDCl}_3$ , 500 MHz)  $\delta$ : 2.16 (s, 6H), 4.74 (d, 1H,  $J = 7.0$  Hz), 4.82 (dd, 1H,  $J = 7.5, 12.5$  Hz), 4.98 (dd, 1H,  $J = 3.5, 12.0$  Hz), 5.77–5.80 (m, 1H), 6.13 (s, 2H), 6.40 (s, 1H), 7.48–7.52 (m, 1H), 7.60–7.63 (m, 1H), 7.68 (d, 1H,  $J = 7.5$  Hz), 8.09 (dd, 1H,  $J = 1.0, 8.0$  Hz);  $^{13}\text{C}$  NMR ( $\text{CDCl}_3$ , 125 MHz)  $\delta$ : 21.4, 52.6, 79.3, 111.6, 121.4, 125.7, 129.0, 129.6, 133.6, 134.4, 139.2, 144.8, 148.6.

**Compound 3i.** oily liquid;  $^1\text{H}$  NMR ( $\text{CDCl}_3$ , 500 MHz)  $\delta$ : 3.69 (s, 3H), 4.59 (d, 1H,  $J = 5.5$  Hz), 4.82 (dd, 1H,  $J = 7.5, 12.5$  Hz), 4.99 (dd, 1H,  $J = 3.5, 12.5$  Hz), 5.71 (d, 1H,  $J = 3.0$  Hz), 6.45–6.47 (m, 2H), 6.68–6.71 (m, 2H), 7.48–7.51 (m, 1H), 7.61 (t, 1H,  $J = 7.5$  Hz), 7.69 (d, 1H,  $J = 8.0$  Hz), 8.07 (d, 1H,  $J = 8.0$  Hz);  $^{13}\text{C}$  NMR ( $\text{CDCl}_3$ , 125 MHz)  $\delta$ : 53.5, 55.6, 79.3, 115.0, 115.3, 125.7, 129.0, 129.6, 133.5, 134.3, 138.7, 148.7, 153.3.

**Compound 3j.** mp 78–79 °C;  $^1\text{H}$  NMR ( $\text{CDCl}_3$ , 500 MHz)  $\delta$ : 4.85 (dd, 1H,  $J = 7.5, 12.5$  Hz), 4.90 (d, 1H,  $J = 7.0$  Hz), 5.01 (dd, 1H,  $J = 3.5, 12.5$  Hz), 5.74–5.77 (m, 1H), 6.40–6.43 (m, 2H), 7.04–7.08 (m, 2H), 7.52–7.54 (m, 1H), 7.61–7.65 (m, 2H), 8.09–8.11 (m, 1H);  $^{13}\text{C}$  NMR ( $\text{CDCl}_3$ , 125 MHz)  $\delta$ : 52.8, 79.1, 114.8, 124.2, 125.9, 128.9, 129.4, 129.9, 132.8, 134.4, 143.4, 148.6.

**Compound 3k.** mp 118–120 °C;  $^1\text{H}$  NMR ( $\text{CDCl}_3$ , 500 MHz)  $\delta$ : 2.44–2.50 (m, 4H), 3.61–3.63 (m, 4H), 4.78–4.83 (m, 1H), 4.92–4.96 (m, 2H), 7.48–7.55 (m, 2H), 7.58–7.62 (m, 1H), 7.80 (dd, 1H,  $J = 1.0, 8.0$  Hz);  $^{13}\text{C}$  NMR ( $\text{CDCl}_3$ , 125 MHz)  $\delta$ : 50.2, 61.5, 66.7, 75.3, 125.0, 128.7, 129.4, 131.1, 132.5, 150.4.

**Compound 3l.** mp 86–87 °C;  $^1\text{H}$  NMR ( $\text{CDCl}_3$ , 500 MHz)  $\delta$ : 2.36–2.39 (m, 2H), 2.47–2.51 (m, 2H), 3.64–3.68 (m, 4H), 4.27–4.30 (m, 1H), 4.54 (dd, 1H,  $J = 6.0, 12.0$  Hz), 4.91–4.95 (m, 1H),

7.10 (d, 2H,  $J = 8.5$  Hz), 7.52 (d, 2H,  $J = 8.5$  Hz);  $^{13}\text{C}$  NMR ( $\text{CDCl}_3$ , 125 MHz)  $\delta$ : 50.1, 66.5, 66.9, 76.6, 122.8, 129.9, 132.0, 133.2.

**Compound 3m.** mp 119–121 °C;  $^1\text{H}$  NMR ( $\text{CDCl}_3$ , 500 MHz)  $\delta$ : 2.22 (s, 6H), 4.27 (s, 1H), 4.67 (s, 1H), 4.69 (d, 1H,  $J = 2.0$  Hz), 5.13 (s, 1H), 6.22 (s, 2H), 6.43 (s, 1H), 7.33–7.37 (m, 4H);  $^{13}\text{C}$  NMR ( $\text{CDCl}_3$ , 125 MHz)  $\delta$ : 21.5, 56.0, 79.8, 111.8, 121.2, 127.9, 129.5, 134.4, 136.5, 139.2, 145.4.

**Compound 3n.** mp 91–92 °C;  $^1\text{H}$  NMR ( $\text{CDCl}_3$ , 500 MHz)  $\delta$ : 2.36–2.38 (m, 2H), 2.48–2.51 (m, 2H), 3.64–3.68 (m, 4H), 4.30 (dd, 1H,  $J = 6.0, 8.5$  Hz), 4.54 (dd, 1H,  $J = 6.5, 12.5$  Hz), 4.94 (dd, 1H,  $J = 9.0, 12.5$  Hz), 7.16 (d, 2H,  $J = 8.5$  Hz), 7.36 (d, 2H,  $J = 8.5$  Hz);  $^{13}\text{C}$  NMR ( $\text{CDCl}_3$ , 125 MHz)  $\delta$ : 50.1, 66.5, 66.9, 76.7, 129.0, 129.6, 132.6, 134.7.

**Compound 3o.** mp 112–113 °C;  $^1\text{H}$  NMR ( $\text{CDCl}_3$ , 500 MHz)  $\delta$ : 2.15 (s, 6H), 4.35 (d, 1H,  $J = 3.5$  Hz), 4.68 (dd, 1H,  $J = 8.5, 12.5$  Hz), 4.94 (dd, 1H,  $J = 4.5, 12.5$  Hz), 5.98–6.00 (m, 1H), 6.24 (s, 2H), 6.40 (s, 1H), 7.44 (t, 1H,  $J = 7.5$  Hz), 7.56–7.59 (m, 1H), 7.64–7.67 (m, 2H), 7.83 (d, 1H,  $J = 8.0$  Hz), 7.94 (d, 1H,  $J = 8.0$  Hz), 8.19 (d, 1H,  $J = 8.5$  Hz);  $^{13}\text{C}$  NMR ( $\text{CDCl}_3$ , 125 MHz)  $\delta$ : 21.4, 53.1, 79.0, 111.6, 121.0, 121.7, 123.8, 125.7, 126.1, 127.3, 129.3, 129.5, 130.4, 132.7, 134.2, 139.2, 145.7

**Compound 5a.** mp 72 °C;  $^1\text{H}$  NMR ( $\text{CDCl}_3$ , 500 MHz)  $\delta$ : 4.75 (dd, 1H,  $J = 6, 12.5$  Hz), 4.85–4.93 (m, 2H), 7.29–7.30 (m, 2H), 7.33–7.38 (m, 6H), 7.42–7.44 (m, 2H);  $^{13}\text{C}$  NMR ( $\text{CDCl}_3$ , 125 MHz)  $\delta$ : 49.9, 78.5, 127.7, 128.7, 128.8, 129.0, 129.4, 131.9, 133.8, 136.3.

**Compound 5b.** oily liquid;  $^1\text{H}$  NMR ( $\text{CDCl}_3$ , 500 MHz)  $\delta$ : 3.63 (AB quartet, 2H,  $J = 13.5, 43.5$  Hz), 4.41 (dd, 1H,  $J = 7.0, 9.0$  Hz), 4.62–4.71 (m, 2H), 7.23–7.28 (m, 5H), 7.30–7.36 (m, 5H);  $^{13}\text{C}$  NMR ( $\text{CDCl}_3$ , 125 MHz)  $\delta$ : 36.1, 46.0, 79.1, 127.5, 127.8, 128.5, 128.7, 128.9, 129.1, 136.9, 137.1.

**Compound 5c.** mp 109–110 °C;  $^1\text{H}$  NMR ( $\text{CDCl}_3$ , 500 MHz)  $\delta$ : 4.73–4.77 (m, 1H), 4.86–4.90 (m, 1H), 4.98–5.01 (m, 1H), 7.30–7.34 (m, 5H), 7.44 (d, 1H,  $J = 8.5$  Hz), 7.51–7.53 (m, 2H),

7.73-7.84 (m, 3H), 7.89 (s, 1H);  $^{13}\text{C}$  NMR ( $\text{CDCl}_3$ , 125 MHz)  $\delta$ : 49.9, 78.6, 126.9, 127.1, 127.7, 127.8, 128.7, 129.0, 129.1, 129.2, 130.2, 133.0, 133.2, 133.6, 136.3.

**Compound 5d.** mp 81–82 °C;  $^1\text{H}$  NMR ( $\text{CDCl}_3$ , 500 MHz)  $\delta$ : 2.39 (s, 3H), 4.66-4.72 (m, 1H), 4.79-4.85 (m, 2H), 7.12 (d, 2H,  $J = 7.5$  Hz), 7.24-7.33 (m, 7H);  $^{13}\text{C}$  NMR ( $\text{CDCl}_3$ , 125 MHz)  $\delta$ : 21.2, 50.2, 78.6, 127.7, 128.2, 128.5, 128.9, 130.1, 134.3, 136.5, 139.2.

**Compound 5e.** mp 49–51 °C;  $^1\text{H}$  NMR ( $\text{CDCl}_3$ , 500 MHz)  $\delta$ : 4.78-4.82 (m, 1H), 4.85-4.89 (m, 1H), 4.95 (dd, 1H,  $J = 6.0, 9.5$  Hz), 7.32-7.39 (m, 5H), 7.52 (t, 1H,  $J = 8.0$  Hz), 7.58 (dd, 1H,  $J = 1.5, 6.5$  Hz), 8.10 (t, 1H,  $J = 2.0$  Hz), 8.16-8.18 (m, 1H);  $^{13}\text{C}$  NMR ( $\text{CDCl}_3$ , 125 MHz)  $\delta$ : 49.2, 77.8, 122.7, 123.6, 129.5, 129.6, 130.0, 130.5, 133.8, 134.4, 138.8, 148.4.

**Compound 5f.** oily liquid;  $^1\text{H}$  NMR ( $\text{CDCl}_3$ , 500 MHz)  $\delta$ : 3.70 (AB quartet, 2H,  $J = 14.0, 56.0$  Hz), 4.46-4.49 (m, 1H), 4.69 (s, 1H), 4.71 (d, 1H,  $J = 1.5$  Hz), 7.22-7.24 (m, 2H), 7.28-7.34 (m, 3H), 7.51 (t, 1H,  $J = 8.0$  Hz), 7.56 (td, 1H,  $J = 1.5, 3.0, 8.0$  Hz), 8.12 (t, 1H,  $J = 1.5$  Hz), 8.14-8.16 (m, 1H);  $^{13}\text{C}$  NMR ( $\text{CDCl}_3$ , 125 MHz)  $\delta$ : 36.4, 45.2, 78.4, 122.9, 123.4, 127.8, 128.9, 130.1, 133.9, 136.3, 139.7, 148.5.

**Compound 5g.** mp 125–126 °C;  $^1\text{H}$  NMR ( $\text{CDCl}_3$ , 500 MHz)  $\delta$ : 4.81-4.93 (m, 2H), 5.06 (dd, 1H,  $J = 6.0, 8.5$  Hz), 7.42 (dd, 1H,  $J = 1.5, 8.5$  Hz), 7.49-7.60 (m, 4H), 7.76-7.90 (m, 4H), 8.17-8.18 (m, 2H);  $^{13}\text{C}$  NMR ( $\text{CDCl}_3$ , 125 MHz)  $\delta$ : 49.2, 77.9, 122.8, 123.6, 127.1, 127.4, 127.7, 127.8, 129.5, 130.0, 130.3, 133.2, 133.5, 133.8, 134.2, 138.7.

**Compound 5h.** oily liquid;  $^1\text{H}$  NMR ( $\text{CDCl}_3$ , 500 MHz)  $\delta$ : 3.80 (s, 3H), 4.78-4.86 (m, 3H), 6.82-6.85 (m, 2H), 7.26-7.29 (m, 2H), 7.50-7.53 (m, 2H), 8.03-8.04 (m, 1H), 8.15-8.17 (m, 1H);  $^{13}\text{C}$  NMR ( $\text{CDCl}_3$ , 125 MHz)  $\delta$ : 49.7, 55.4, 77.7, 115.1, 120.4, 122.7, 123.4, 129.9, 133.8, 137.2, 138.9, 148.4, 161.1.

**Compound 5i.** mp 62–63 °C;  $^1\text{H}$  NMR ( $\text{CDCl}_3$ , 500 MHz)  $\delta$ : 4.76-4.80 (m, 1H), 4.83-4.87 (m, 1H), 4.93 (dd, 1H,  $J = 6.0, 9.0$  Hz), 7.22-7.24 (m, 2H), 7.45-7.47 (m, 2H), 7.53-7.55 (m, 2H), 8.14 (t, 1H,  $J = 1.5$  Hz), 8.19 (td, 1H,  $J = 2.0, 4.0, 8.0$  Hz);  $^{13}\text{C}$  NMR ( $\text{CDCl}_3$ , 125 MHz)  $\delta$ : 49.3, 77.7, 122.7, 123.7, 124.2, 129.6, 130.1, 132.8, 133.7, 135.7, 138.5, 148.5.

**Compound 5j.** oily liquid;  $^1\text{H}$  NMR ( $\text{CDCl}_3$ , 500 MHz)  $\delta$ : 4.81 (dd, 1H,  $J = 6.5, 14.0$  Hz), 4.97 (dd, 1H,  $J = 9.5, 14.0$  Hz), 5.69 (dd, 1H,  $J = 6.0, 9.0$  Hz), 7.31-7.36 (m, 3H), 7.40-7.43 (m, 3H), 7.46-7.49 (m, 1H), 7.57-7.58 (m, 1H), 7.96 (dd, 1H,  $J = 1.5, 8.5$  Hz);  $^{13}\text{C}$  NMR ( $\text{CDCl}_3$ , 125 MHz)  $\delta$ : 44.5, 77.6, 125.6, 128.7, 129.3, 129.4, 129.6, 131.0, 131.6, 133.4, 134.3, 148.9.

**Compound 5k.** oily liquid;  $^1\text{H}$  NMR ( $\text{CDCl}_3$ , 500 MHz)  $\delta$ : 3.77 (d, 2H,  $J = 2.5$  Hz), 4.58 (dd, 1H,  $J = 7.0, 13.5$  Hz), 4.81 (dd, 1H,  $J = 7.5, 13.5$  Hz), 5.11 (t, 1H,  $J = 7.5$  Hz), 7.18-7.19 (m, 2H), 7.23-7.28 (m, 3H), 7.42-7.45 (m, 1H), 7.57-7.61 (m, 2H), 7.88 (dd, 1H,  $J = 0.5, 8.0$  Hz);  $^{13}\text{C}$  NMR ( $\text{CDCl}_3$ , 125 MHz)  $\delta$ : 37.4, 41.4, 78.6, 125.1, 127.7, 128.5, 128.8, 129.1, 129.4, 129.9, 132.8, 133.5, 136.3, 148.9.

**Compound 5l.** mp 105–106 °C;  $^1\text{H}$  NMR ( $\text{CDCl}_3$ , 500 MHz)  $\delta$ : 4.84 (dd, 1H,  $J = 6.5, 14.0$  Hz), 5.00 (dd, 1H,  $J = 9.0, 14.0$  Hz), 5.80 (dd, 1H,  $J = 6.0, 9.0$  Hz), 7.43-7.50 (m, 3H), 7.52-7.58 (m, 3H), 7.76-7.84 (m, 3H), 7.90 (s, 1H), 7.98 (dd, 1H,  $J = 1.0, 9.0$  Hz);  $^{13}\text{C}$  NMR ( $\text{CDCl}_3$ , 125 MHz)  $\delta$ : 44.5, 77.6, 125.6, 127.0, 127.3, 127.8, 128.2, 128.7, 129.4, 129.4, 130.3, 131.6, 133.2, 133.4, 133.5, 134.0, 149.0.

**Compound 5m.** mp 51–52 °C;  $^1\text{H}$  NMR ( $\text{CDCl}_3$ , 500 MHz)  $\delta$ : 4.80 (dd, 1H,  $J = 6.5, 13.5$  Hz), 4.96 (dd, 1H,  $J = 9.0, 14.0$  Hz), 5.64-5.67 (m, 1H), 7.25-7.27 (m, 2H), 7.42-7.45 (m, 3H), 7.48-7.51 (m, 1H), 7.58-7.62 (m, 1H), 7.97 (dd, 1H,  $J = 1.0, 8.0$  Hz);  $^{13}\text{C}$  NMR ( $\text{CDCl}_3$ , 125 MHz)  $\delta$ : 44.8, 77.6, 124.0, 125.6, 128.7, 129.5, 130.2, 131.4, 132.7, 133.5, 135.6, 148.9.

**Compound 5n.** mp 68–69 °C;  $^1\text{H}$  NMR ( $\text{CDCl}_3$ , 500 MHz)  $\delta$ : 4.69-4.72 (m, 1H), 4.76-4.84 (m, 2H), 7.12-7.14 (m, 2H), 7.32-7.39 (m, 5H), 7.45-7.47 (m, 2H);  $^{13}\text{C}$  NMR ( $\text{CDCl}_3$ , 125 MHz)  $\delta$ : 49.3, 78.2, 122.7, 129.1, 129.3, 129.5, 131.3, 132.2, 134.0, 135.5.

**Compound 5o.** mp 122–123 °C;  $^1\text{H}$  NMR ( $\text{CDCl}_3$ , 500 MHz)  $\delta$ : 4.72-4.76 (m, 1H), 4.80-4.84 (m, 1H), 4.94 (dd, 1H,  $J = 6.5, 9.5$  Hz), 7.15-7.18 (m, 2H), 7.42 (dd, 1H,  $J = 1.5, 8.5$  Hz), 7.45-7.47 (m, 2H), 7.52-7.55 (m, 2H), 7.77-7.85 (m, 3H), 7.89 (d, 1H,  $J = 1.5$  Hz);  $^{13}\text{C}$  NMR ( $\text{CDCl}_3$ , 125 MHz)  $\delta$ : 49.3, 78.3, 122.7, 127.0, 127.2, 127.7, 127.8, 128.6, 129.2, 129.3, 130.2, 132.2, 133.1, 133.5, 135.5.

**Compound 5p.** mp 60–61 °C;  $^1\text{H}$  NMR ( $\text{CDCl}_3$ , 500 MHz)  $\delta$ : 4.69-4.73 (m, 1H), 4.77-4.86 (m, 2H), 7.18 (d, 2H,  $J = 8.5$  Hz), 7.30-7.39 (m, 7H);  $^{13}\text{C}$  NMR ( $\text{CDCl}_3$ , 125 MHz)  $\delta$ : 49.3, 78.3, 129.0, 129.1, 129.2, 129.5, 131.4, 134.0, 134.5, 134.9.

**Compound 5q.** oily liquid;  $^1\text{H}$  NMR ( $\text{CDCl}_3$ , 500 MHz)  $\delta$ : 3.63 (AB quartet, 2H,  $J = 13.5, 53.0$  Hz), 4.35-4.38 (m, 1H), 4.62 (s, 1H), 4.64 (d, 1H,  $J = 2.0$  Hz), 7.19-7.24 (m, 4H), 7.28-7.34 (m, 5H);  $^{13}\text{C}$  NMR ( $\text{CDCl}_3$ , 125 MHz)  $\delta$ : 36.1, 45.3, 78.9, 127.7, 128.8, 128.9, 129.2, 129.2, 134.4, 135.7, 136.7.

**Compound 5r.** mp 123–124 °C;  $^1\text{H}$  NMR ( $\text{CDCl}_3$ , 500 MHz)  $\delta$ : 4.72-4.76 (m, 1H), 4.80-4.85 (m, 1H), 4.95 (dd, 1H,  $J = 6.0, 9.5$  Hz), 7.22-7.23 (m, 2H), 7.29-7.31 (m, 2H), 7.42 (dd, 1H,  $J = 2.0, 8.5$  Hz), 7.52-7.54 (m, 2H), 7.77-7.84 (m, 3H), 7.89 (d, 1H,  $J = 1.5$  Hz);  $^{13}\text{C}$  NMR ( $\text{CDCl}_3$ , 125 MHz)  $\delta$ : 49.3, 78.4, 127.0, 127.2, 127.7, 127.8, 128.6, 129.0, 129.2, 129.2, 130.2, 133.1, 133.5, 133.6, 134.6, 134.9.
